# Supplementary material for: Hetero-nuclear coordinated compounds for use in high-performance supercapacitor electrode material design
Source: Royal Society of Chemistry journal article supplement (doi:10.1039/c4qi00088a), 2014-01-01
Supplement: c4qi00088a1.pdf [file c4qi00088a1.pdf]

## Hetero-nuclear Coordinated Compounds for Use In High-Performance Supercapacitor Electrode Materials Design

### Supporting information

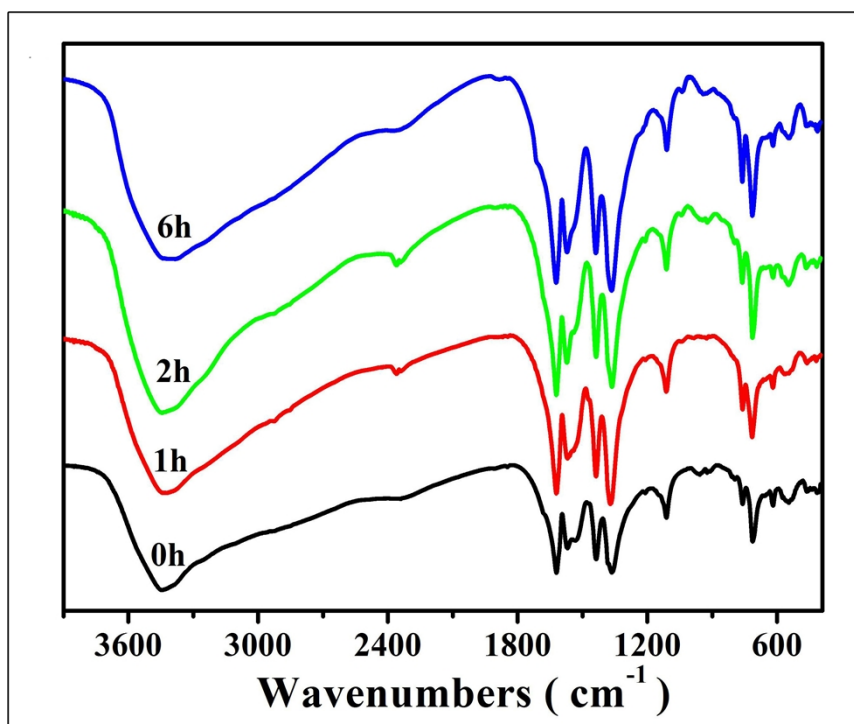

**Fig. S1.** (a) The IR spectra of single crystals of 1, and Ni<sup>2+</sup>-exchanged single crystals for 1 h, 2 h, and 6 h.

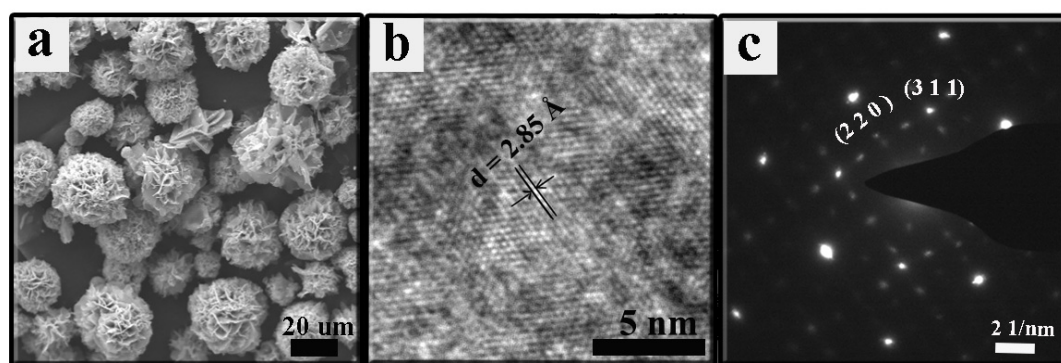

**Fig. S2** (a) SEM image of Ni<sub>x</sub>Co<sub>3-x</sub>S<sub>4</sub>. (b) HRTEM image of Ni<sub>0.42</sub>Co<sub>2.58</sub>S<sub>4</sub>. (c) SAED pattern of Ni<sub>0.42</sub>Co<sub>2.58</sub>S<sub>4</sub>.

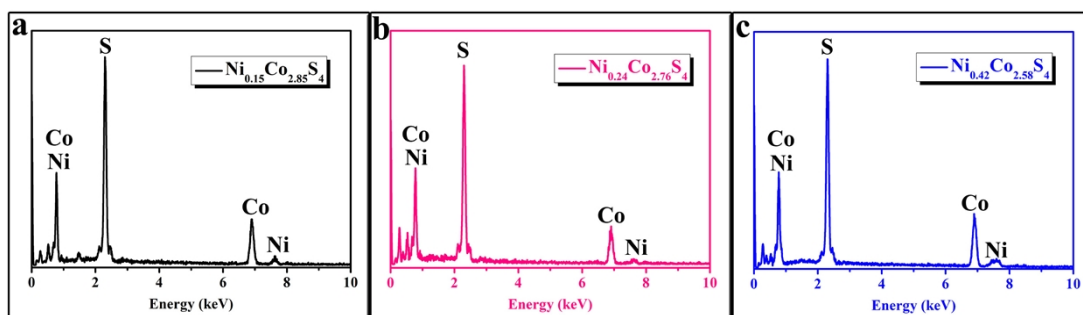

**Fig. S3** EDX spectra of (a)  $\text{Ni}_{0.15}\text{Co}_{2.85}\text{S}_4$ , (b)  $\text{Ni}_{0.24}\text{Co}_{2.76}\text{S}_4$ , (c)  $\text{Ni}_{0.42}\text{Co}_{2.58}\text{S}_4$ .

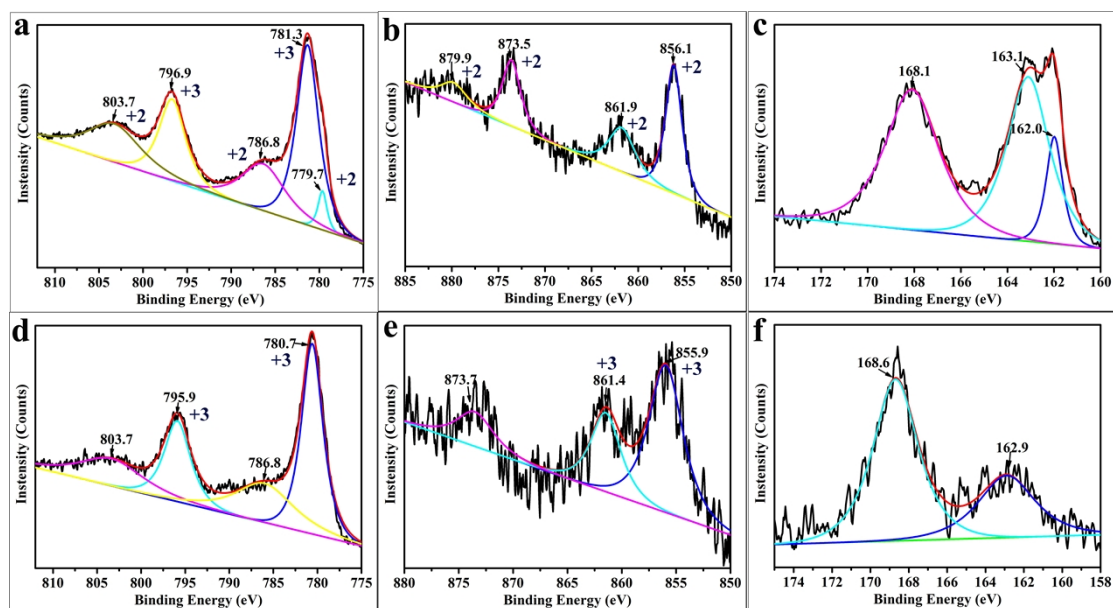

**Fig. S4** The XPS spectra of (a) Co 2p, (b) Ni 2p, (c) S 2p for  $\text{Ni}_{0.42}\text{Co}_{2.58}\text{S}_4$ . And the XPS spectra of (d) Co 2p, (e) Ni 2p, (f) S 2p for  $\text{Ni}_{0.42}\text{Co}_{2.58}\text{S}_4$  after the oxidation reaction during the CV test at the scan rate of 0.5 mV/s.

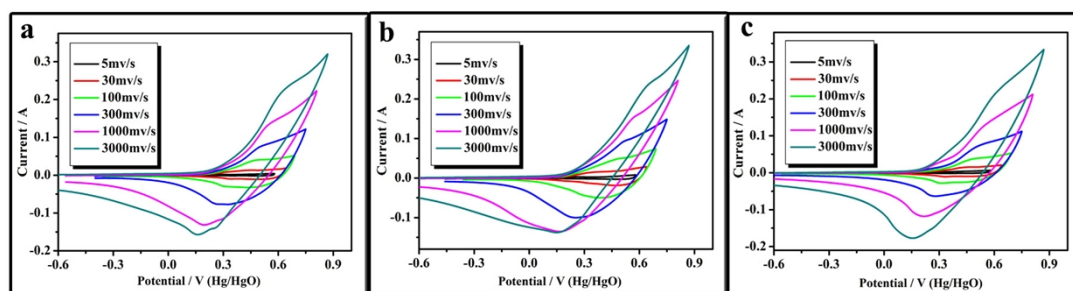

**Fig. S5** CV curves of (a)  $\text{Ni}_{0.15}\text{Co}_{2.85}\text{S}_4$ , (b)  $\text{Ni}_{0.24}\text{Co}_{2.76}\text{S}_4$ , (c)  $\text{Ni}_{0.42}\text{Co}_{2.58}\text{S}_4$  at various scan rates.

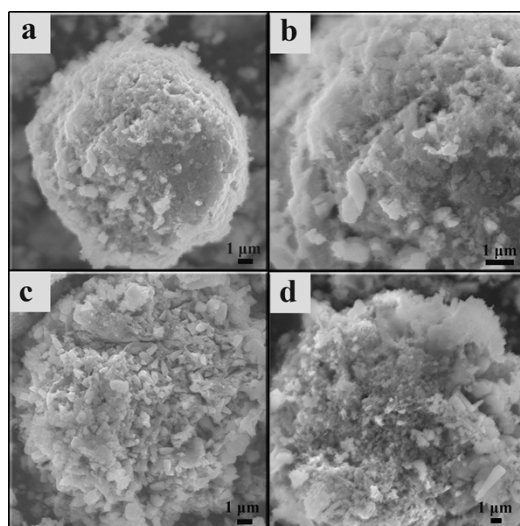

**Fig. S6** (a to d) Scanning electron microscopy (SEM) images  $\text{Ni}_{0.24}\text{Co}_{2.76}\text{S}_4$  after 2 cycles CV test.

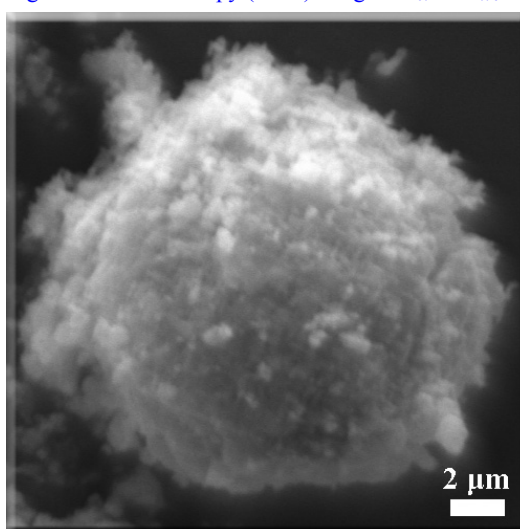

**Fig. S7** Scanning electron microscopy (SEM) images  $\text{Ni}_{0.24}\text{Co}_{2.76}\text{S}_4$  after 100 cycles CV test.
